# Supplementary material for: Statistical analysis of 3D localisation microscopy images for quantification of membrane protein distributions in a platelet clot model
Source: PLoS Comput Biol. 2020 Jun 30;16(6):e1007902. doi: 10.1371/journal.pcbi.1007902 (PMC7384682; doi:10.1371/journal.pcbi.1007902)
Supplement: S2 Table — The table displays all statistical p-values determined from several chosen pairwise compared distributions of CD62p proteins in IL-1β treated/untreated clots. Samples 1–3 display the comparison of CD62p from IL-1β untreated samples (stained with Alexa488-labelled anti-CD41-antibody) and samples 4–5 show the comparison of CD62p from IL-1β treated samples. (XLSX) [file pcbi.1007902.s017.xlsx]

## Sheet: Sheet1
	Aggregated density and curvature comparison				SIM_M			Aggregated density and curvature comparison					SIM_L
	Sample 1	Sample 2	Sample 3	Sample 4	Sample 5				Sample 1	Sample 2	Sample 3	Sample 4	Sample 5
Sample 1	0.965	0.808	0.78	0.204	0.403			Sample 1	1	0.953	0.868	0.134	0.398
Sample 2	0.808	0.97	0.909	0.215	0.466			Sample 2	0.953	1	1	0.179	0.45
Sample 3	0.78	0.909	0.96	0.291	0.25			Sample 3	0.868	1	1	0.317	0.121
Sample 4	0.204	0.215	0.291	0.98	0.526			Sample 4	0.134	0.179	0.317	1	0.64
Sample 5	0.403	0.466	0.25	0.526	0.94			Sample 5	0.398	0.45	0.121	0.64	1
	Aggregated density and curvature comparison				avg pvalue				Aggregated density and curvature comparison				MLP
	Sample 1	Sample 2	Sample 3	Sample 4	Sample 5				Sample 1	Sample 2	Sample 3	Sample 4	Sample 5
Sample 1	0.72	0.128	0.114	0.0204	0.0403			Sample 1	1	0.89	0.85	0.17	0.34
Sample 2	0.128	0.73	0.277	0.021	0.046			Sample 2	0.89	1	0.98	0.19	0.3
Sample 3	0.114	0.277	0.69	0.029	0.025			Sample 3	0.85	0.98	1	0.33	0.14
Sample 4	0.0204	0.021	0.029	0.59	0.578			Sample 4	0.17	0.19	0.33	1	0.67
Sample 5	0.0403	0.046	0.025	0.578	0.7			Sample 5	0.34	0.3	0.14	0.67	1
	Aggregated Ripley Statistic				SIM_M				Aggregated Ripley Statistic				SIM_L
	Sample 1	Sample 2	Sample 3	Sample 4	Sample 5				Sample 1	Sample 2	Sample 3	Sample 4	Sample 5
Sample 1	0.96	0.88	0.748	0.525	0.6			Sample 1	1	0.8	0.706	0.2685	0.5
Sample 2	0.88	0.94	0.86	0.433	0.008			Sample 2	0.8	1	0.97	0.213	0.01
Sample 3	0.748	0.86	0.95	0.31	0.14			Sample 3	0.706	0.97	1	0.17	0.015
Sample 4	0.525	0.433	0.31	0.98	0.592			Sample 4	0.2685	0.213	0.17	1	0.278
Sample 5	0.6	0.008	0.14	0.592	0.93			Sample 5	0.5	0.01	0.015	0.278	1
